# Supplementary material for: A conserved behavioral role for a nematode interneuron neuropeptide receptor
Source: Oxford University Press journal article supplement (doi:10.1093/genetics/iyab198), 2021-11-06
Supplement: iyab198_supplementary_data.pdf [file iyab198_supplementary_data.pdf]

## **Supplementary Materials for:**

### **A conserved behavioral role for a nematode interneuron neuropeptide receptor**

Cynthia M. Chai<sup>1\*</sup>, Wen Chen<sup>1\*</sup>, Wan-Rong Wong<sup>1\*</sup>, Heenam Park<sup>1</sup>, Sarah M. Cohen<sup>1</sup>, Xuan Wan<sup>1</sup>, Paul W. Sternberg<sup>1†</sup>

<sup>1</sup> Division of Biology & Biological Engineering, California Institute of Technology, 1200 E California Blvd, Pasadena CA 91125, USA

**†AUTHOR FOR CORRESPONDENCE:**

Paul W. Sternberg ([pws@caltech.edu](mailto:pws@caltech.edu))

\* These authors contributed equally to this work.

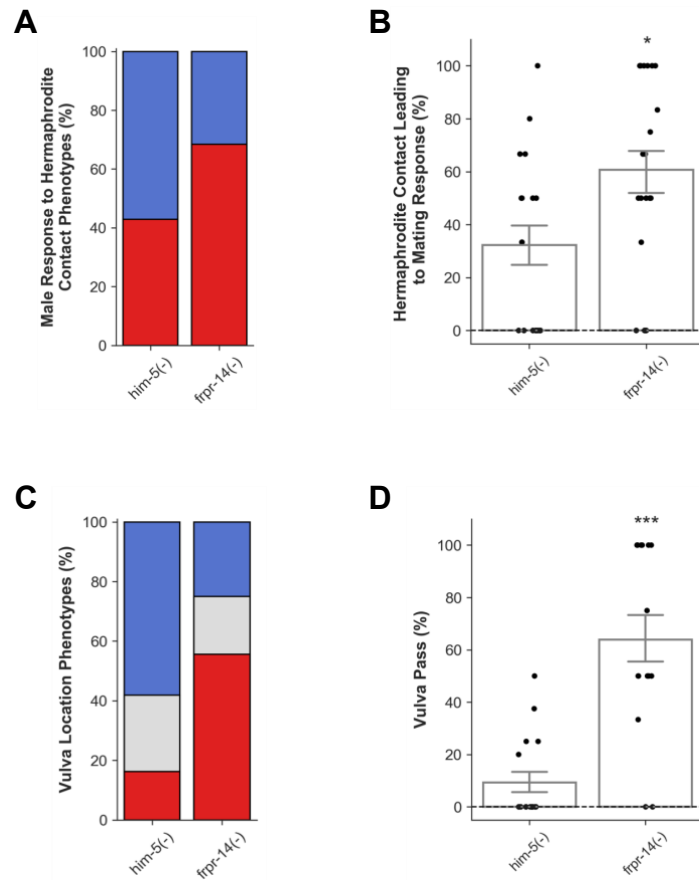

**Figure S1: *frpr-14* mutant males are defective in vulva location and initiating mating response upon hermaphrodite contact.**

(A) Proportions of pooled male response to hermaphrodite contact phenotypes. Red – contact not leading to mating response, blue – contact leading to mating response. *him-5(-)* (n=35 events), *frpr-14(-)* (n=57 events).

(B) Percentage of hermaphrodite contact events leading to male mating response. *him-5(-)* (n=18 animals), *frpr-14(-)* (n=21 animals). Wilcoxon rank sum test. \* p<0.05. p=1.916e-02.

(C) Proportions of pooled vulva location phenotypes. Red – vulva pass, gray – hesitation upon vulva encounter, blue – successful vulva location. *him-5(-)* (n=43 encounters), *frpr-14(-)* (n=36 encounters).

(D) Percentage of vulva encounters resulting in vulva passing. *him-5(-)* (n=17 animals), *frpr-14(-)* (n=15 animals). Wilcoxon rank sum test. \*\*\* p<0.001. p=6.538e-05.

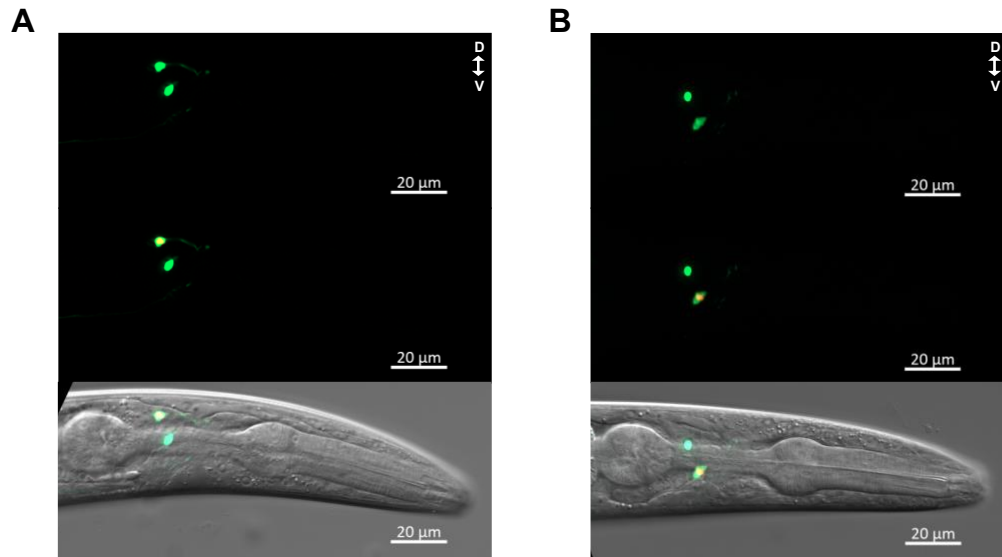

**Figure S2: *frpr-14* translational GFP reporter colocalizes with AVH and AIB-specific markers.**

Representative images of *frpr-14* translational GFP reporter co-expressed with (A) AVH::*mCherry-H2B* and (B) AIB::*mCherry-H2B* in L4 stage animals. Top – GFP only. Middle – GFP and mCherry merge. Bottom – DIC, GFP, and mCherry merge.

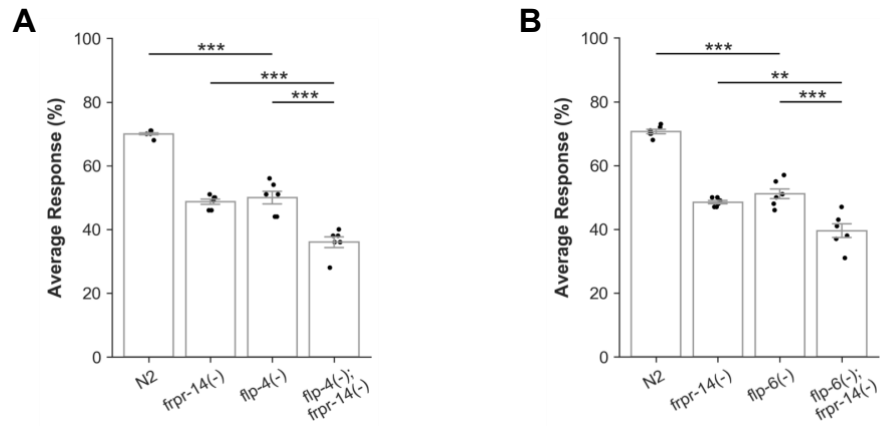

**Figure S3: *flp-4* and *flp-6* receptor double mutant epistasis analysis for touch-evoked escape response.**

(A) *flp-4(-); frpr-14(-)*. Error bars represent standard error of the mean. N=6 batches. One-way ANOVA followed by Tukey's HSD posthoc. \*\*\*  $p < 0.001$ , n.s.=no significance. N2 – *flp-4(-)* ( $p = 2.035e-08$ ), *flp-4(-)* – *frpr-14(-)* ( $p = 9.100e-01$ ), *flp-4(-)* – *flp-4(-); frpr-14(-)* ( $p = 5.331e-6$ ).

(B) *flp-6(-); frpr-14(-)*. Error bars represent standard error of the mean. N=6 batches. One-way ANOVA followed by Tukey's HSD posthoc. \*\*\*  $p < 0.001$ , n.s.=no significance. N2 – *flp-6(-)* ( $p = 5.920e-08$ ), *flp-6(-)* – *frpr-14(-)* ( $p = 5.896e-01$ ), *flp-6(-)* – *flp-6(-); frpr-14(-)* ( $p = 1.030e-4$ ).

|             |                                                               |     |
|-------------|---------------------------------------------------------------|-----|
| CE-FRPR-14  | MEPSTIELLDFEPPPIFCNSCLGSTDPEYLTYNLAVSGVLLAIVGMIGLIGNMLLVKTYL  | 60  |
| CBR-FRPR-14 | MEASTSQMLNFEPPPIFCNSCLGSTDPEYLTYNLAVSGVLLAIVGMIGLIGNILVVKTYL  | 60  |
|             | ** * * : * : ***** : *****                                    |     |
| CE-FRPR-14  | HPEQAIHSTSIYLAALAFSDFFLVLTAMFLFVLEAWRHHDYPTLAYLYVIGAPIVFPVAA  | 120 |
| CBR-FRPR-14 | HPELAIHSTSIYLAALGFSDFFLVLTAMFLFVLEAWRHHDYPTLAYLYVIGAPIVFPVAA  | 120 |
|             | ** * ***** , *****                                            |     |
| CE-FRPR-14  | VFQTSVVYFCVAAAVDCFIMVVLPEVSKQLYCTPRRAKITCVVLMICFIYNIPHFFELE   | 180 |
| CBR-FRPR-14 | VFQTSVVYFCVAAAVDCFIVVVLPEVSKVLYCTPRRAKMTCLILVICCAYNVPHPFELE   | 180 |
|             | ***** : ***** ***** : * : * : * * * * : *****                 |     |
| CE-FRPR-14  | KVDCLDEDGRDSMQICPTDIRLDPAYYAIYYTYMYTFFLAIGPLTLLILLNICVVFTVVT  | 240 |
| CBR-FRPR-14 | KVDCLDDNGLDSMQICPTDIRLDAAYYAIYYTYMYTFFLAIGPLSLLILLNVCVVFTVVT  | 240 |
|             | ***** : * ***** ***** : ***** : *****                         |     |
| CE-FRPR-14  | KGSSNENGEDDTISLILVVFFFIFCNFTALMVNFMEIILNDPMSMLVYFVDLSNLLVVVNG | 300 |
| CBR-FRPR-14 | KGSNEENGEDDTISLILVVFFFIFCNFTALMVNFMEIIFDDPTMLVYFVDLSNLLVVVNG  | 300 |
|             | ** * . ***** : * : * : *****                                  |     |
| CE-FRPR-14  | TANFFCYLIFGTSFRATLKKVVLGSPAKRSVAVLWINDEEHKNQOSHALI            | 349 |
| CBR-FRPR-14 | TANFFCYFIFGTSFRNTLKKTILGAPAKRSVAVLWINDQENKNQQTSLI-            | 348 |
|             | ***** : ***** * * * . : * : ***** : * : * * * : *             |     |

**Figure S4: Multiple sequence alignment of *C. elegans* CE-FRPR-14 and *C. briggsae* CBR-FRPR-14.**

CE-FRPR-14 and CBR-FRPR-14 share 88.51% identity. Alignment performed in Clustal Omega.

| <i>flp</i> | Strain | Allele        |
|------------|--------|---------------|
| 1          | PS8997 | <i>sy1599</i> |
| 2          | PS7370 | <i>ok3351</i> |
| 3          | PS7379 | <i>ok3265</i> |
| 4          | PS9050 | <i>sy1606</i> |
| 5          | VC3280 | <i>gk3123</i> |
| 6          | VC2324 | <i>ok3056</i> |
| 7          | RB1990 | <i>ok2625</i> |
| 8          | PT501  | <i>pk360</i>  |
| 9          | PS5793 | <i>yn36</i>   |
| 10         | PS7474 | <i>ok2624</i> |
| 11         | PS7727 | <i>tm2706</i> |
| 12         | RB1863 | <i>ok2409</i> |
| 13         | PS6813 | <i>tm2427</i> |
| 14         | VC1957 | <i>gk1055</i> |
| 15         | VC2504 | <i>gk1186</i> |
| 16         | RB2275 | <i>ok3085</i> |
| 17         | PS7473 | <i>n4894</i>  |
| 18         | AX1410 | <i>db99</i>   |
| 19         | RB1902 | <i>ok2460</i> |
| 20         | RB2188 | <i>ok2964</i> |
| 21         | RB982  | <i>ok889</i>  |
| 22         | PS9052 | <i>sy1608</i> |
| 24         | VC1971 | <i>gk3109</i> |
| 25         | VC1982 | <i>gk1016</i> |
| 32         | PS7219 | <i>sy853</i>  |
| 34         | PS7220 | <i>sy810</i>  |

**Table S1. List of *flp* mutant strains screened for spontaneous motility phenotype.**
